# Supplementary material for: Magnetic iron/carbon nanorods derived from a metal organic framework as an efficient heterogeneous catalyst for the chemical oxidation process in water
Source: Royal Society of Chemistry journal article supplement (doi:10.1039/c5ra06043e), 2015-01-01
Supplement: c5ra06043e1.pdf [file c5ra06043e1.pdf]

## Electronic Supporting Information

for

Magnetic Iron/Carbon Nanorod Derived from  
Metal Organic Framework as an Efficient  
Heterogeneous Catalyst for Chemical Oxidation  
Process in Water

*Kun-Yi Andrew Lin\* and Fu-Kong Hsu*

Department of Environmental Engineering, National Chung Hsing University,  
250 Kuo-Kuang Road, Taichung, Taiwan, R.O.C.

\*Corresponding Author. Tel: +886-4-22854709, E-mail address: [linky@nchu.edu.tw](mailto:linky@nchu.edu.tw)

(Kun-Yi Andrew Lin)

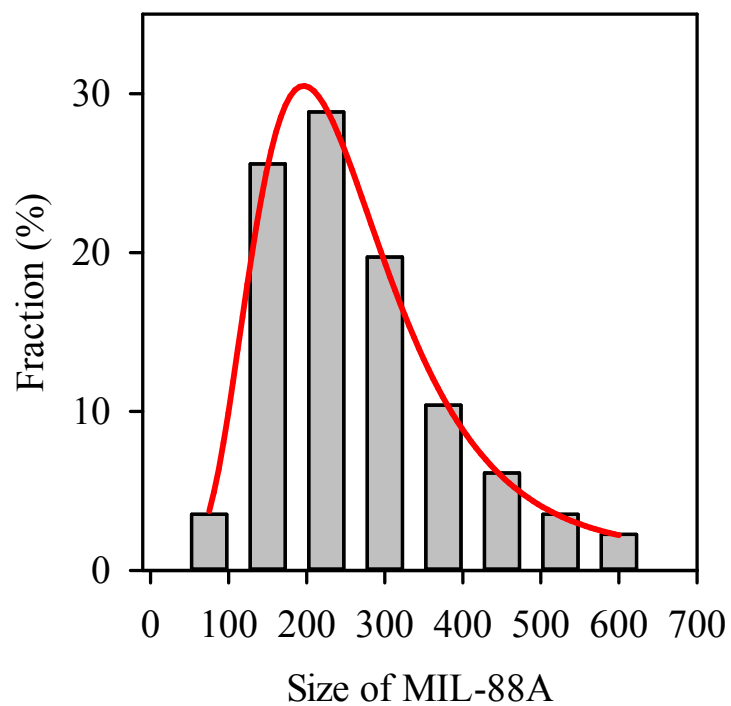

Fig. S1. The size distribution of MIL-88A nanorod. The red line shows the fitting curve for the distribution by Log Normal distribution model.

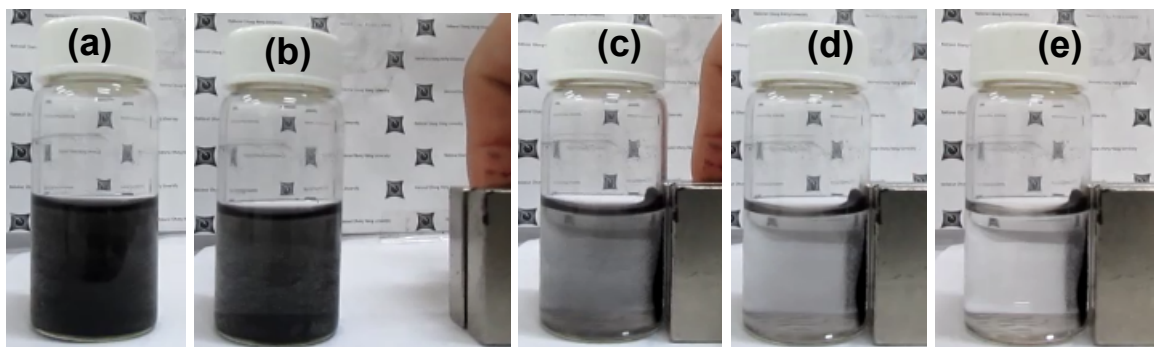

Fig. S2. Sequential pictures showing the quick separation of MICN from water by a permanent magnet: (a)  $t = 0$  s, (b)  $t = 2$  s, (c)  $t = 3$  s, (d)  $t = 5$  s, and (e)  $t = 10$  s.

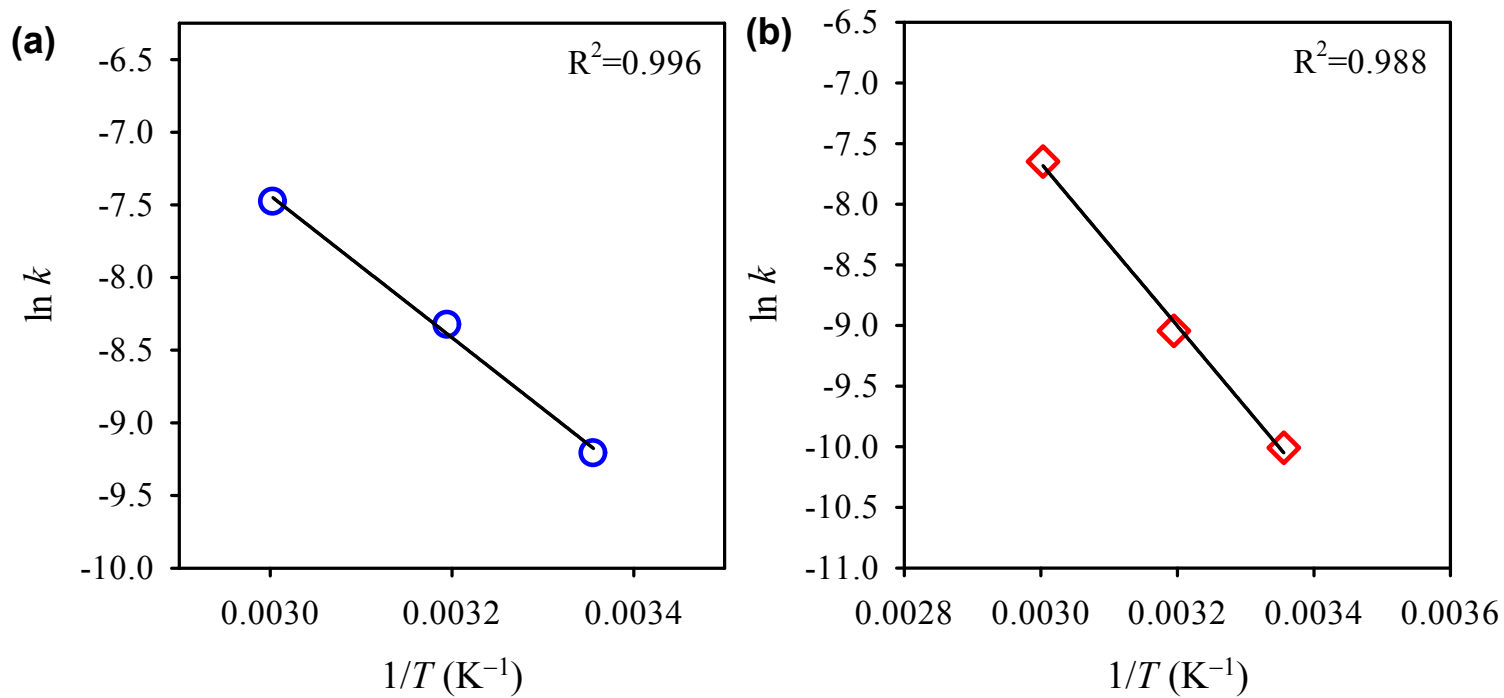

Fig. S3. The Arrhenius plots of Rhodamine B decolorization using MICN-activated oxidative processes: (a) peroxide and (b) persulfate.

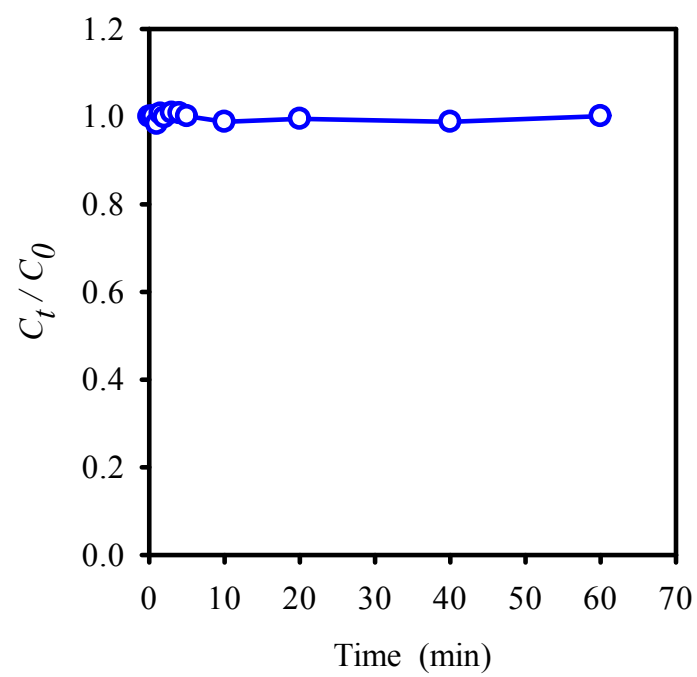

Fig. S4. Photolysis of RB ( $50 \text{ mg L}^{-1}$ ) in water by the UV irradiation at  $25 \text{ }^\circ\text{C}$ .
